# Supplementary material for: A method to disentangle and quantify host anabolic turnover in photosymbiotic holobionts with subcellular resolution
Source: PubMed Central journal article supplement (PMC6949218; doi:10.1038/s42003-019-0742-6), 2020-01-08
Supplement: 42003_2019_742_MOESM1_ESM.pdf [file 42003_2019_742_MOESM1_ESM.pdf]

## Supplementary Figures

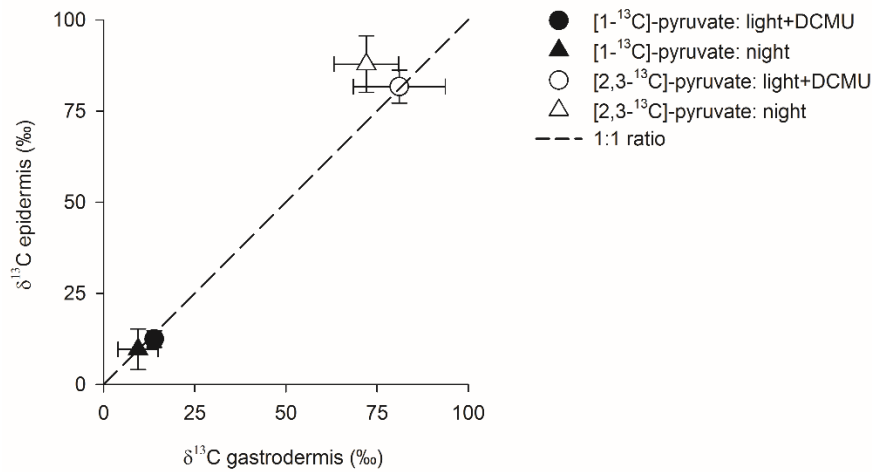

**Supplementary Fig. 1. <sup>13</sup>C-assimilation in the epidermis relative to the gastrodermis in the light+DCMU and night incubations.** The congruence between the two suggests the two tissue layers have access to, and assimilate pyruvate equally. Dashed line denotes 1:1 ratio.

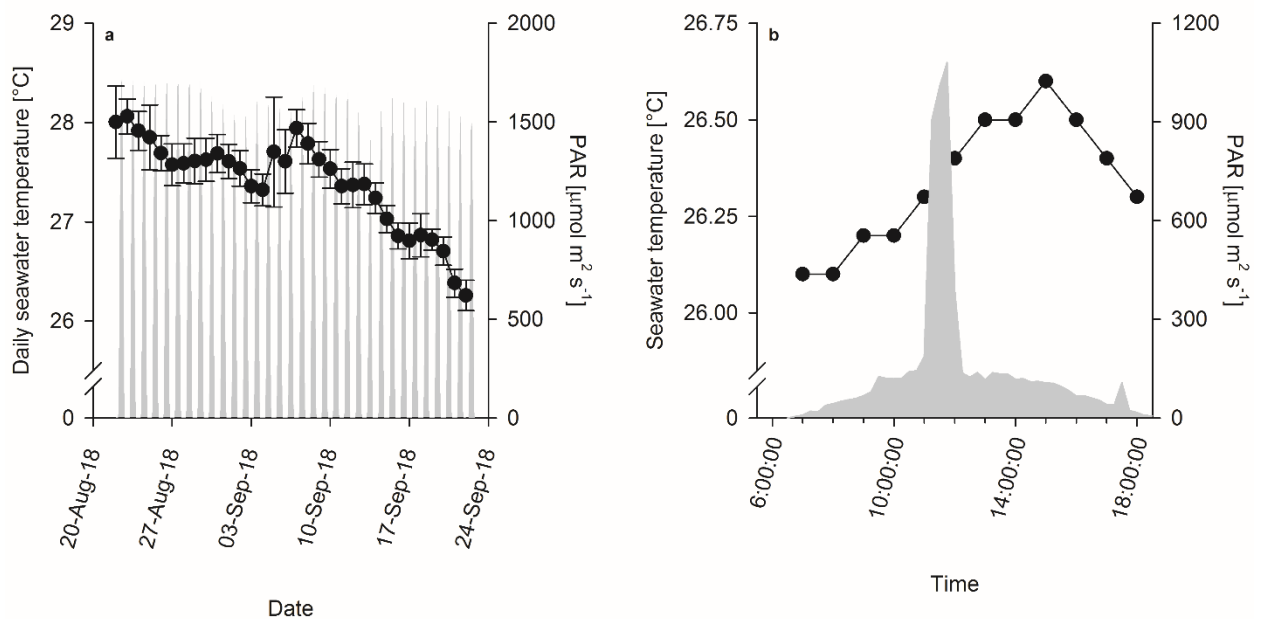

**Supplementary Fig. 2. Environmental conditions.** Three coral colonies were collected on the 22<sup>nd</sup> of August, 2018. The corals were fragmented (4 cm pieces) mounted on numbered plugs and placed in separate tanks in the Red Sea Simulator for one month before the experiments were conducted. Shown: (a) daily temperature (mean  $\pm$  s.d) and light conditions experienced during the month-long acclimation phase (data collected by The Israel National Monitoring Program in the Gulf of Eilat: <http://www.iui-eilat.ac.il/Research/NMPMeteoData.aspx>); and (b) hourly temperature (mean) and light conditions during the light and light+DCMU isotopic pulses.

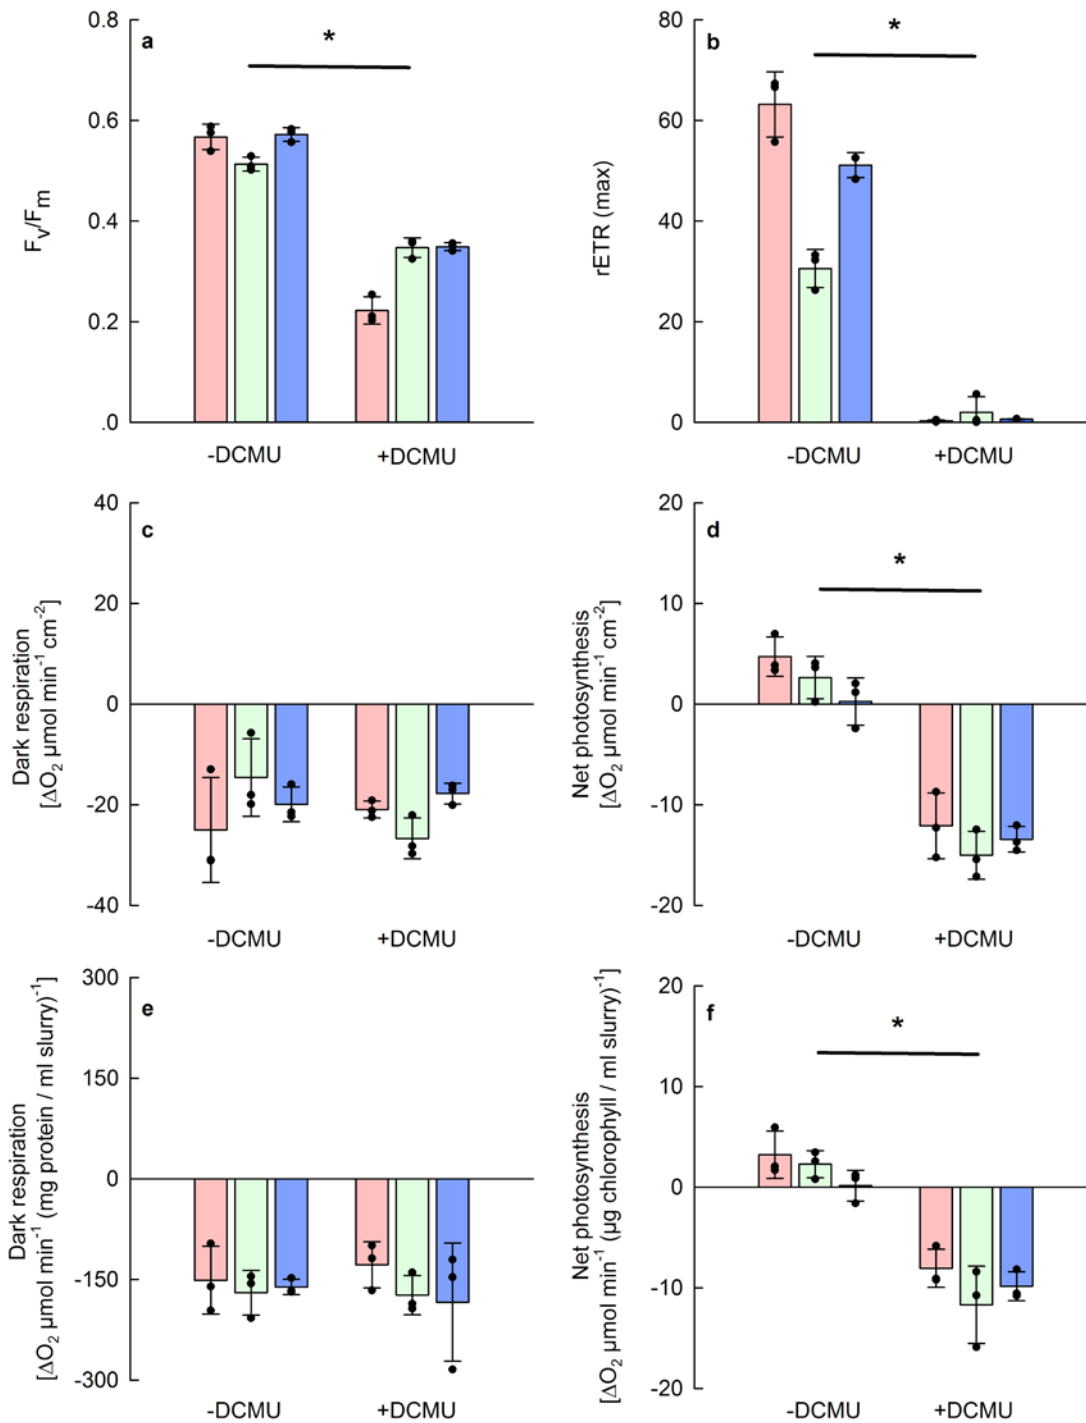

**Supplementary Fig. 3. Assessing the effects of 10  $\mu\text{M}$  DCMU on coral physiology.** a. maximum quantum yield of photosystem II ( $F_v/F_m$ ); b. maximum relative electron transport rate (rETR max); c. dark respiration normalized to the surface area of the coral. d. net photosynthesis normalized to the surface area of the coral. e. respiration normalized by host protein content. f. net photosynthesis normalized to total chlorophyll content. Note that measurements were conducted in triplicate (i.e.  $n = 3$  fragments *per* colony), and bars show mean  $\pm$  s.d. The three biological replicates (i.e. colonies) are coloured differently. Asterisks represent significant differences (Students t-test;  $p < 0.05$ ) between treatments. The methodology used to derive these results and an expanded interpretation of the results is provided in the Supplementary Methods and Discussion section.

## Supplementary Tables

**Supplementary Table 1. Statistical output showing differences in  $^{13}\text{C}$ -assimilation between structures in the coral polyp.** Shown is the outcome of a two-way ANOVA conducted to test whether there is a common pattern in anabolism between regions of interest in polyps from different coral colonies. Statistically-significant factors ( $p < 0.005$ ) are highlighted in bold.

| Source                             | DF | F-ratio | <i>p</i> -value    |
|------------------------------------|----|---------|--------------------|
| Colony                             | 2  | 2.2762  | 0.1137             |
| Region of interest                 | 3  | 12.5284 | <b>&lt; 0.0001</b> |
| Colony $\times$ Region of interest | 6  | 4.1028  | <b>0.0021</b>      |

**Supplementary Table 2. Statistical output showing differences in  $^{13}\text{C}$ -assimilation between structures in individual polyps.** Shown is the outcome of a three one-way ANOVAs conducted to test whether anabolism varies in different structural components of the coral polyp. Statistically-significant factors ( $p < 0.005$ ) are highlighted in bold.

| Source             | Colony | DF | F-ratio | <i>p</i> -value |
|--------------------|--------|----|---------|-----------------|
| Region of interest | 1      | 3  | 12.6075 | <b>0.0002</b>   |
|                    | 2      | 3  | 11.4329 | <b>0.0003</b>   |
|                    | 3      | 3  | 0.8345  | 0.4944          |

**Supplementary Table 3. Summary of  $^{13}\text{C}$ -enrichment values from the *proof-of concept* experiment.**

Regions of interest (ROI) were based on coenosarc cross sections from the oral tissue layer. Gastrodermis ROIs refer to the gastrodermis tissue with symbionts and lipids subtracted.

| Treatment         | Isotope                         | Colony            | ROI               | $\delta^{13}\text{C}$ |         | N  |
|-------------------|---------------------------------|-------------------|-------------------|-----------------------|---------|----|
|                   |                                 |                   |                   | mean                  | SD      |    |
| Light             | $[1-^{13}\text{C}]$ -pyruvate   | 1                 | Epidermis         | 14.442                | 1.224   | 8  |
|                   |                                 |                   | Gastrodermis      | 35.700                | 3.400   | 8  |
|                   |                                 |                   | Host lipid bodies | 114.451               | 38.172  | 26 |
|                   |                                 |                   | Symbiont          | 178.146               | 56.550  | 31 |
|                   |                                 | 2                 | Epidermis         | 8.788                 | 5.281   | 5  |
|                   |                                 |                   | Gastrodermis      | 20.755                | 5.065   | 5  |
|                   |                                 |                   | Host lipid bodies | 143.215               | 55.493  | 13 |
|                   |                                 |                   | Symbiont          | 152.759               | 65.879  | 35 |
|                   |                                 | 3                 | Epidermis         | 11.672                | 8.142   | 7  |
|                   |                                 |                   | Gastrodermis      | 31.585                | 13.542  | 7  |
|                   |                                 |                   | Host lipid bodies | 178.045               | 124.155 | 13 |
|                   |                                 |                   | Symbiont          | 135.489               | 56.102  | 36 |
|                   | $[2,3-^{13}\text{C}]$ -pyruvate | 1                 | Epidermis         | 96.118                | 15.625  | 8  |
|                   |                                 |                   | Gastrodermis      | 98.884                | 11.501  | 8  |
|                   |                                 |                   | Host lipid bodies | 155.134               | 58.930  | 16 |
|                   |                                 |                   | Symbiont          | 152.671               | 58.957  | 34 |
|                   |                                 | 2                 | Epidermis         | 91.623                | 17.114  | 8  |
|                   |                                 |                   | Gastrodermis      | 99.059                | 12.525  | 8  |
| Host lipid bodies |                                 |                   | 132.185           | 40.214                | 8       |    |
| Symbiont          |                                 |                   | 105.152           | 43.689                | 35      |    |
| 3                 |                                 | Epidermis         | 110.928           | 26.576                | 9       |    |
|                   |                                 | Gastrodermis      | 142.865           | 6.991                 | 9       |    |
|                   |                                 | Host lipid bodies | 162.149           | 67.148                | 58      |    |
|                   |                                 | Symbiont          | 329.342           | 100.656               | 33      |    |
| Light+DCMU        | $[1-^{13}\text{C}]$ -pyruvate   | 1                 | Epidermis         | 8.402                 | 4.422   | 7  |
|                   |                                 |                   | Gastrodermis      | 13.439                | 4.816   | 7  |
|                   |                                 |                   | Host lipid bodies | 10.105                | 11.115  | 12 |
|                   |                                 |                   | Symbiont          | 6.086                 | 6.103   | 30 |
|                   |                                 | 2                 | Epidermis         | 12.694                | 4.538   | 7  |
|                   |                                 |                   | Gastrodermis      | 11.007                | 6.430   | 7  |
|                   |                                 |                   | Host lipid bodies | 11.750                | 16.785  | 6  |
|                   |                                 |                   | Symbiont          | 7.044                 | 8.020   | 33 |
|                   |                                 | 3                 | Epidermis         | 16.294                | 4.446   | 11 |
|                   |                                 |                   | Gastrodermis      | 17.189                | 3.825   | 11 |
|                   |                                 |                   | Host lipid bodies | 10.500                | 15.385  | 25 |
|                   |                                 |                   | Symbiont          | 9.205                 | 7.474   | 29 |
|                   | $[2,3-^{13}\text{C}]$ -pyruvate | 1                 | Epidermis         | 73.549                | 9.910   | 7  |
|                   |                                 |                   | Gastrodermis      | 67.741                | 18.487  | 7  |
|                   |                                 |                   | Host lipid bodies | 69.132                | 21.985  | 6  |
|                   |                                 |                   | Symbiont          | 7.169                 | 13.679  | 36 |
|                   |                                 | 2                 | Epidermis         | 89.109                | 9.208   | 6  |
|                   |                                 |                   | Gastrodermis      | 69.224                | 3.563   | 7  |
| Host lipid bodies |                                 |                   | 71.058            | 40.669                | 11      |    |
| Symbiont          |                                 |                   | 15.246            | 12.396                | 34      |    |
| 3                 |                                 | Epidermis         | 82.469            | 16.044                | 9       |    |
|                   |                                 | Gastrodermis      | 106.231           | 20.965                | 9       |    |
|                   |                                 | Host lipid bodies | 50.894            | 30.517                | 21      |    |
|                   |                                 | Symbiont          | 3.414             | 12.048                | 33      |    |

|                   |                                 |                   |                   |                   |        |        |    |
|-------------------|---------------------------------|-------------------|-------------------|-------------------|--------|--------|----|
| Night             | [1- <sup>13</sup> C]-pyruvate   | 1                 | Epidermis         | -1.534            | 3.384  | 8      |    |
|                   |                                 |                   | Gastrodermis      | -1.472            | 2.918  | 8      |    |
|                   |                                 |                   | Host lipid bodies | -1.114            | 9.704  | 2      |    |
|                   |                                 |                   | Symbiont          | -6.692            | 8.737  | 31     |    |
|                   |                                 | 2                 | Epidermis         | 15.014            | 1.974  | 8      |    |
|                   |                                 |                   | Gastrodermis      | 13.991            | 1.842  | 8      |    |
|                   |                                 |                   | Host lipid bodies | 12.845            | 10.669 | 16     |    |
|                   |                                 | 3                 | Epidermis         | 15.391            | 5.107  | 8      |    |
|                   |                                 |                   | Gastrodermis      | 15.713            | 4.137  | 8      |    |
|                   | Host lipid bodies               |                   | 12.423            | 15.843            | 25     |        |    |
|                   | [2,3- <sup>13</sup> C]-pyruvate | 1                 | Epidermis         | 87.402            | 9.988  | 8      |    |
|                   |                                 |                   | Gastrodermis      | 62.680            | 12.610 | 8      |    |
| Host lipid bodies |                                 |                   | 63.386            | 12.813            | 16     |        |    |
| Symbiont          |                                 |                   | 12.621            | 6.333             | 40     |        |    |
| 2                 |                                 | Epidermis         | 101.525           | 10.142            | 6      |        |    |
|                   |                                 | Gastrodermis      | 63.643            | 13.617            | 6      |        |    |
|                   |                                 | Host lipid bodies | 52.212            | 16.250            | 6      |        |    |
| 3                 |                                 | Epidermis         | 74.691            | 17.058            | 8      |        |    |
|                   |                                 | Gastrodermis      | 89.726            | 11.330            | 8      |        |    |
|                   | Host lipid bodies               | 51.425            | 30.359            | 38                |        |        |    |
| Symbiont          |                                 | 9.325             | 10.217            | 36                |        |        |    |
|                   | Unlabelled                      | None              | n/a               | Epidermis         | -0.323 | 1.583  | 15 |
|                   |                                 |                   |                   | Gastrodermis      | -0.101 | 1.113  | 15 |
|                   |                                 |                   |                   | Host lipid bodies | 0.687  | 13.843 | 19 |
| Symbiont          |                                 |                   |                   | 1.029             | 7.766  | 82     |    |

**Supplementary Table 4. Statistical output of the differences in <sup>13</sup>C-assimilation between [1-<sup>13</sup>C] and [2,3-<sup>13</sup>C]-pyruvate.** Shown is the outcome of multiple student's t-tests conducted for each experimental treatment and each region of interest (oral tissue layers of the coral coenosarc). Bonferroni-corrected ( $\alpha < 0.004$ ) statistically-significant differences are highlighted in bold here, and with asterisks on Figure 2.

| Region of interest | Treatment  | Test outcome                   |
|--------------------|------------|--------------------------------|
| Epidermis          | Light      | t(28) = 19.5490, $p = <0.0001$ |
|                    | Light+DCMU | t(27) = 22.1164, $p = <0.0001$ |
|                    | Night      | t(31) = 19.4811, $p = <0.0001$ |
| Gastrodermis       | Light      | t(34) = 15.9961, $p = <0.0001$ |
|                    | Light+DCMU | t(24) = 13.0641, $p = <0.0001$ |
|                    | Night      | t(21) = 9.8528, $p = <0.0001$  |
| Host lipid bodies  | Light      | t(101) = 1.1746, $p = 0.8785$  |
|                    | Light+DCMU | t(64) = 8.3225, $p = <0.0001$  |
|                    | Night      | t(95) = 10.7870, $p = <0.0001$ |
| Symbiont           | Light      | t(170) = 2.0843, $p = 0.9807$  |
|                    | Light+DCMU | t(160) = 0.7933, $p = 0.7856$  |
|                    | Night      | t(150) = 0.2051, $p = 0.5811$  |

**Supplementary Table 5. Statistical output showing differences in <sup>13</sup>C-assimilation between treatments.**

Shown are the output from a restricted maximum-likelihood model, using treatment as a fixed factor and colony as a random factor (variance components analysis). Any transformations to the data (required to meet the conditions of normality and homogeneity of variance) are described. Statistically-significant differences ( $p < 0.05$ ) are shown in bold here, and the results of the least squares means Tukey HSD *post-hoc* tests are indicated using letters on Figure 2.

| Isotope                         | Transformation | Region of interest | Treatment                                   | Colony |
|---------------------------------|----------------|--------------------|---------------------------------------------|--------|
| [1- <sup>13</sup> C]-pyruvate   | -              | Epidermis          | F <sub>2,64</sub> = 1.7544, $p = 0.1812$    | 27%    |
|                                 | -              | Gastrodermis       | F <sub>2,64</sub> = 43.4161, $p < 0.0001$   | 12%    |
|                                 | Square root    | Host lipid bodies  | F <sub>2,132</sub> = 107.8197, $p < 0.0001$ | 7%     |
|                                 | Square root    | Symbiont           | F <sub>2,244</sub> = 808.1129, $p < 0.0001$ | 2%     |
| [2,3- <sup>13</sup> C]-pyruvate | Square root    | Epidermis          | F <sub>2,64</sub> = 6.7017, $p = 0.0023$    | 0%     |
|                                 | -              | Gastrodermis       | F <sub>2,65</sub> = 64.0241, $p < 0.0001$   | 71%    |
|                                 | -              | Host lipid bodies  | F <sub>2,183</sub> = 98.8799, $p < 0.0001$  | 0%     |
|                                 | Square root    | Symbiont           | F <sub>2,316</sub> = 312.9260, $p < 0.0001$ | 26%    |

**Supplementary Table 6. Summary of  $^{13}\text{C}$ -enrichment values between different structures in the coral polyp.** Regions of interest (ROI) were taken in polyps from the light+DCMU treatment. This allows for comparison of host anabolism (without the contribution of the algal symbiont), between structures with different biological functions.

| ROI                | Colony | $\delta^{13}\text{C}$ |        | N |
|--------------------|--------|-----------------------|--------|---|
|                    |        | Mean                  | S.D    |   |
| Aboral tissues     | 1      | 53.577                | 7.881  | 5 |
|                    | 2      | 72.857                | 16.436 | 5 |
|                    | 3      | 70.837                | 3.770  | 5 |
| Mesentery filament | 1      | 76.442                | 21.793 | 5 |
|                    | 2      | 96.443                | 18.350 | 5 |
|                    | 3      | 78.325                | 35.879 | 5 |
| Pharynx            | 1      | 64.920                | 20.674 | 5 |
|                    | 2      | 14.273                | 25.341 | 5 |
|                    | 3      | 66.564                | 16.789 | 5 |
| Tentacle           | 1      | 14.964                | 12.879 | 5 |
|                    | 2      | 40.966                | 31.898 | 5 |
|                    | 3      | 52.835                | 34.097 | 5 |

## Supplementary Methods and Discussion

### *Experimental overview*

Three coral fragments from each colony were selected at random and transferred to plastic containers containing 0.22  $\mu\text{m}$  filtered seawater only (i.e. -DCMU;  $n = 3$  per colony,  $n = 3$  colonies). A further three fragments from each colony were transferred to plastic containers containing 0.22  $\mu\text{m}$  filtered seawater and 10  $\mu\text{M}$  of DCMU (+DCMU,  $n = 3$  per colony,  $n = 3$  colonies). Corals were maintained in these respective treatments (i.e.  $\pm$  DCMU) while live measurements were obtained. The effects of DCMU on coral photo-physiology ( $F_v/F_m$  and rETR max) were first assessed using PAM fluorometry. Dark respiration and net photosynthesis were then measured in the same fragments using the  $\text{O}_2$  evolution method. At the end of the incubations, all fragments were snap-frozen in liquid nitrogen and stored at  $-80^\circ\text{C}$  for determination of surface area, host protein content and chlorophyll content. See sections below for details of the protocols used.

### *PAM fluorometry*

Coral fragments were dark-adapted for a minimum of 15 mins; a time-period that is sufficient to stabilize dark-adapted  $F_v/F_m$  values<sup>1</sup>. Rapid light curves<sup>2</sup> (RLC) were generated using an imaging pulse amplitude modulated fluorometer (Heinz Walz GmbH, Effeltrich, Germany), with measurements taken at 30 s intervals ranging from 0 to 701  $\mu\text{mol m}^{-2} \text{s}^{-1}$ . Settings (MI: 2, SI: 10, Gain: 2, Damping: 2) were kept consistent between replicate experimental runs to ensure the results between treatments were comparable. The maximum quantum yield of PSII ( $F_v/F_m$ ; Fig. S2a) was derived from the first yield measurement of the RLC, and maximum relative electron transport rate (rETR max; Fig. S2b) was identified as the maximum value obtained after multiplying the maximum yield of PSII (YII) by the photosynthetically active radiation (PAR).

### *Dark respiration and net photosynthesis*

Dark respiration and net photosynthesis were measured in sealed, stir bar-agitated, glass jars equipped with oxygen optodes that were connected to one of two OXY-4 mini oxygen meters (Precision Sensing GmbH, Regensburg, Germany), capable of recording the oxygen saturation state of the water (%) every second. Dark respiration rates were calculated from the linear slope of the change in relative oxygen saturation *per* minute ( $\Delta\text{O}_2 \text{ min}^{-1}$ ), which was obtained during a period of time ranging from 20 minutes up to an hour (i.e., until a constant slope was observed). 20 min dark-adaptation period is normally sufficient to fully oxidize the plastoquinone (PQ) pool and thus, avoid any light enhanced respiration rates<sup>3</sup>. Net photosynthesis was calculated from the linear slope of the change in relative oxygen saturation *per* minute ( $\Delta\text{O}_2 \text{ min}^{-1}$ ) after 15 mins adaption to 100  $\mu\text{mol photons m}^{-2} \text{s}^{-1}$  of white light. Dark respiration rates were subsequently normalized to both coral surface area (Fig. S2c) and host protein content (Fig. S2e), while net photosynthesis values were normalized to surface area (Figs. S2d) and total chlorophyll content (Fig. S2f).

### *Calculation of normalization factors; host protein content, total chlorophyll and surface area*

Frozen samples were thawed and the coral tissue was brushed into ice-cold phosphate buffered saline (PBS) using a waterpik. The resulting tissue slurry was homogenized (30 s; DIAX 100, Heidolph Instruments, Schwabach, Germany) and centrifuged (10 min,  $5000 \times g$ ,  $4^\circ\text{C}$ ) in order to separate the host tissue and the algal symbionts.



The host-tissue containing supernatant was decanted, vortexed, and an aliquot was removed for analysis of host protein content using the improved Bradford assay with bovine serum albumin (BSA) as the standard<sup>4</sup>. The algal pellet was washed twice in PBS (10 min, 5000 × g, 4 °C), and then re-suspended in 1 mL of 100 % acetone for chlorophyll extraction (24 h at 4 °C). Total chlorophyll content was determined from the fluorescence measured at 630, 663, and 750 nm, and applied to dinoflagellate-specific equations<sup>5</sup>. The remaining skeletons of the coral fragments were left to dry (48 h) and then measured for the surface area *via* the paraffin wax dipping method<sup>6</sup>.

#### *Results and interpretation:*

DCMU addition had a strong and significant effect on all physiological parameters tested, except for dark respiration, which remained stable with or without DCMU (Fig. S2). The flux of electrons from PSII to PSI (i.e. rETR max) was completely blocked by +DCMU (Fig. 2b). DCMU is a known inhibitor of photosynthesis, which blocks the PQ binding site of PSII, preventing the transfer of electrons and protons to the PQ pool. In this state, electrons are no longer transferred to the rest of the photosynthetic chain (plastocyanine and cytochrome b6f), causing an overall inactivation of photosynthesis. Our rETR max results (Fig. S2b) validate the efficiency of DCMU in blocking the electron transport. As a result, net photosynthesis (Figs. 2d, f) was also cancelled in the +DCMU treatment, compared to the -DCMU. A negative rate of oxygen relates to a consumption of oxygen rather than a production. We therefore conclude that +DCMU corals no longer perform photosynthesis. Dark respiration (Figs. 2 c, e) was not affected by +DCMU, with values similar to the negative controls for both normalization parameters (i.e. surface area; Fig. 2c, and host protein content; Fig. 2e). Corals exposed to DCMU displayed levels  $F_v/F_m$  twice as low as for the corals without DCMU (Fig. 2a). The mechanism of chlorophyll fluorescence is independent of the action that DCMU has on PQ, which takes place in PSII. It is not possible from our results to explain why dark respiration is higher in magnitude than net photosynthesis in the +DCMU treatment, but this would be an interesting subject for future studies to investigate.

#### *References*

- 1 Nakamura, T., Van Woesik, R. & Yamasaki, H. Photoinhibition of photosynthesis is reduced by water flow in the reef-building coral *Acropora digitifera*. *Mar. Ecol. Prog. Ser.* **301**, 109-118 (2005).
- 2 Ralph, P. J. & Gademann, R. Rapid light curves: a powerful tool to assess photosynthetic activity. *Aquat. Bot.* **82**, 222-237 (2005).
- 3 Moberg, F., Nyström, M., Kautsky, N., Tedengren, M. & Jarayabhand, P. Effects of reduced salinity on the rates of photosynthesis and respiration in the hermatypic corals *Porites lutea* and *Pocillopora damicornis*. *Mar. Ecol. Prog. Ser.* **157**, 53-59 (1997).
- 4 Zor, T. & Selinger, Z. Linearization of the Bradford protein assay increases its sensitivity: theoretical and experimental studies. *Anal. Biochem.* **236**, 302-308 (1996).
- 5 Jeffrey, S. & Humphrey, G. New spectrophotometric equations for determining chlorophylls *a*, *b*, *c*1 and *c*2 in higher plants, algae and natural phytoplankton. *Biochem. Physiol. Pflanz.* **167**, 191-194 (1975).
- 6 Stimson, J. & Kinzie III, R. A. The temporal pattern and rate of release of zooxanthellae from the reef coral *Pocillopora damicornis* (Linnaeus) under nitrogen-enrichment and control conditions. *J. Exp. Mar. Biol. Ecol.* **153**, 63-74 (1991).
